# Supplementary material
Source: PubMed Central journal article supplement (PMC2918437)
Supplement: supp_M003392_jlr.M003392-1.pdf [file supp_M003392_jlr.M003392-1.pdf]

## Supporting Information

### Figure legends

Figure S1: Production of glucosylceramides in *G. lamblia*. Chromatograms generated by selection of the ion at  $m/z$  700.5727, corresponding to N-hexadecanoyl-1O-glucosylsphingosine (C16 GlcCer) in: A, a base methanolysed lipid extract of *G. lamblia* trophozoites and B, a standard sample of C16 GlcCer. The exact mass cluster of C16 GlcCer (M+1) calculated and found in B are given in C and D, respectively. Assignment details are given in the table.

Figure S2: Biosynthesis of sphingolipids in mammalian cells. Homologues enzymes annotated in the *Giardia* genome database are labeled in red. The sites of action of the sphingolipid inhibitors used in this study are indicated.

Figure S3: Incorporation of serine in *G. lamblia*. Isolated parasites were labeled with [ $^3$ H]palmitic acid (palm) or [ $^3$ H]serine (ser) for 3 h. After extensive washing, cell aliquots were solubilized with 0.1N NaOH and associated radioactivity was measured by liquid scintillation and normalized by protein content. Data are average  $\pm$  SE (n=3) of a representative from three experiments done in triplicate.

Figure S4: Lipid synthesis in presence of tunicamycin. Isolated parasites were labeled with [ $^3$ H]palmitic acid for 3 hrs in presence of 60  $\mu$ M tunicamycin (TM) or solvent (cntl). Lipid aliquots corresponding to equal protein amount were separated by 2D-HPTLC using the solvent systems A. Note the increased amount of GlcCer (spot "A") upon TM treatment.

Figure S5: Ultrastructural abnormalities in presence of PPMP. Electron micrographs of *G. lamblia* treated with 10  $\mu$ M PPMP for 16 h showing coiled multilamellar structures (arrows). N, nucleus. Scale bar: 3  $\mu$ m.

Figure S6: Nocodazole treatment inhibits cell division and CWP1 expression. Parasites were encysted for 16 h in presence of 10  $\mu$ M PPMP, 6  $\mu$ M nocodazole or solvent (cntl). Quantification of parasite number and parasites expressing CWP1 was performed by manual counting. Data are percentage of untreated (cntl) parasites  $\pm$  SE (n = 9) of three experiments done in triplicate.

Figure S7: Protein sequence comparison of giardial GCS with orthologues retrieved by BLAST data base search. Alignment analysis revealed the highest homology of parasite GCS to plant enzymes in terms of amino acid identity and protein length.

Figure

S1

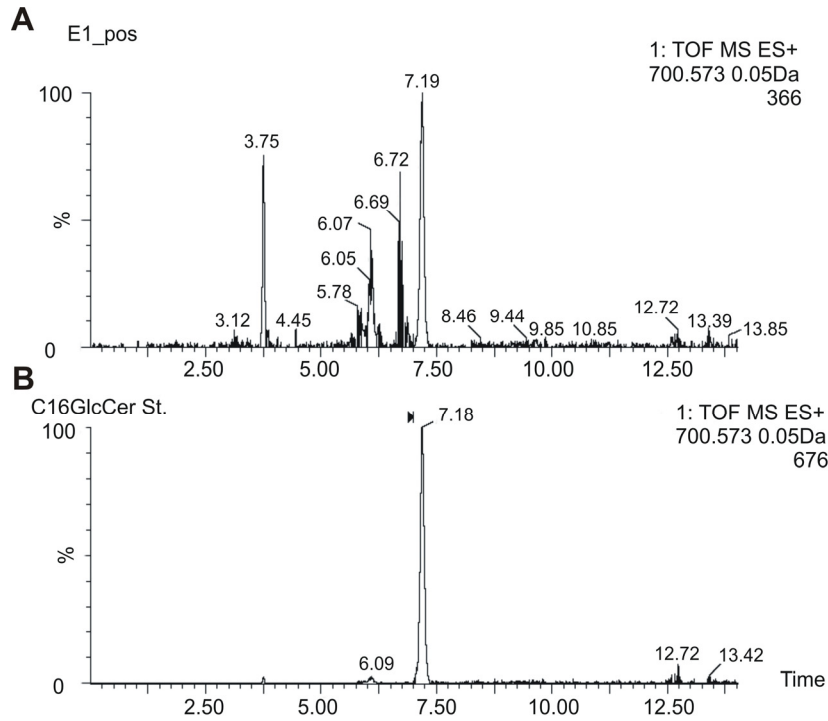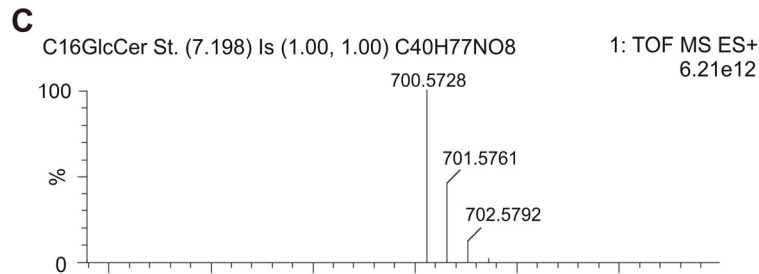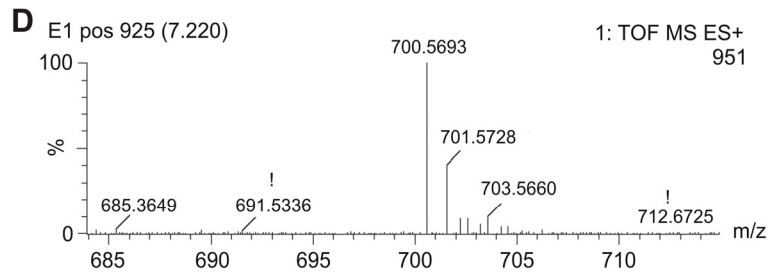

Elemental composition report  
Single mass analysis  
Tolerance=5.0 mDa/DBE: min=-1.5, max=50.0  
Selected filters: none

Monoisotopic mass, even electron ions  
33 formula(e) evaluated with 1 result within limits  
(up to 50 best isotopic matches for each mass)  
Elements used: C: 0-40 H: 0-80 N: 0-2 O: 0-9

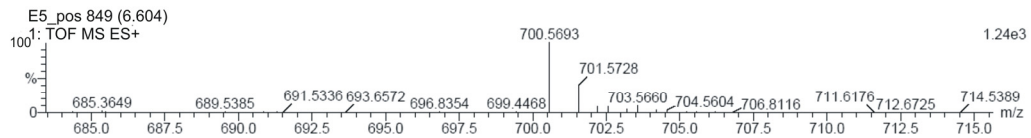

MS-based assignments of C16-GlcCer presents in *G. lamblia* trophozoite extracts

| Measured m/z | Theoretical m/z | error ppm | DBE | i-FIT | Molecular formula |
|--------------|-----------------|-----------|-----|-------|-------------------|
| 700.5727     | 700.5692        | -4.9      | 2.5 | 9.3   | C40H78NO8         |

Figure S2

SPT, serine palmitoyl transferase  
 KSR, 3-ketosphinganine reductase  
 CerS, ceramide synthase  
 CerD, ceramide desaturase  
 GCS, glucosylceramide synthase  
 GalCS, galactosylceramide synthase  
 Cerase, ceramidase  
 SphK, sphingosine kinase  
 SphPP, sphingosine-phosphate phosphatase  
 SMS, sphingomyelin synthase  
 Smase, sphingomyelinase  
 CerK, ceramide kinase  
 CerPP, ceramide-phosphate phosphatase

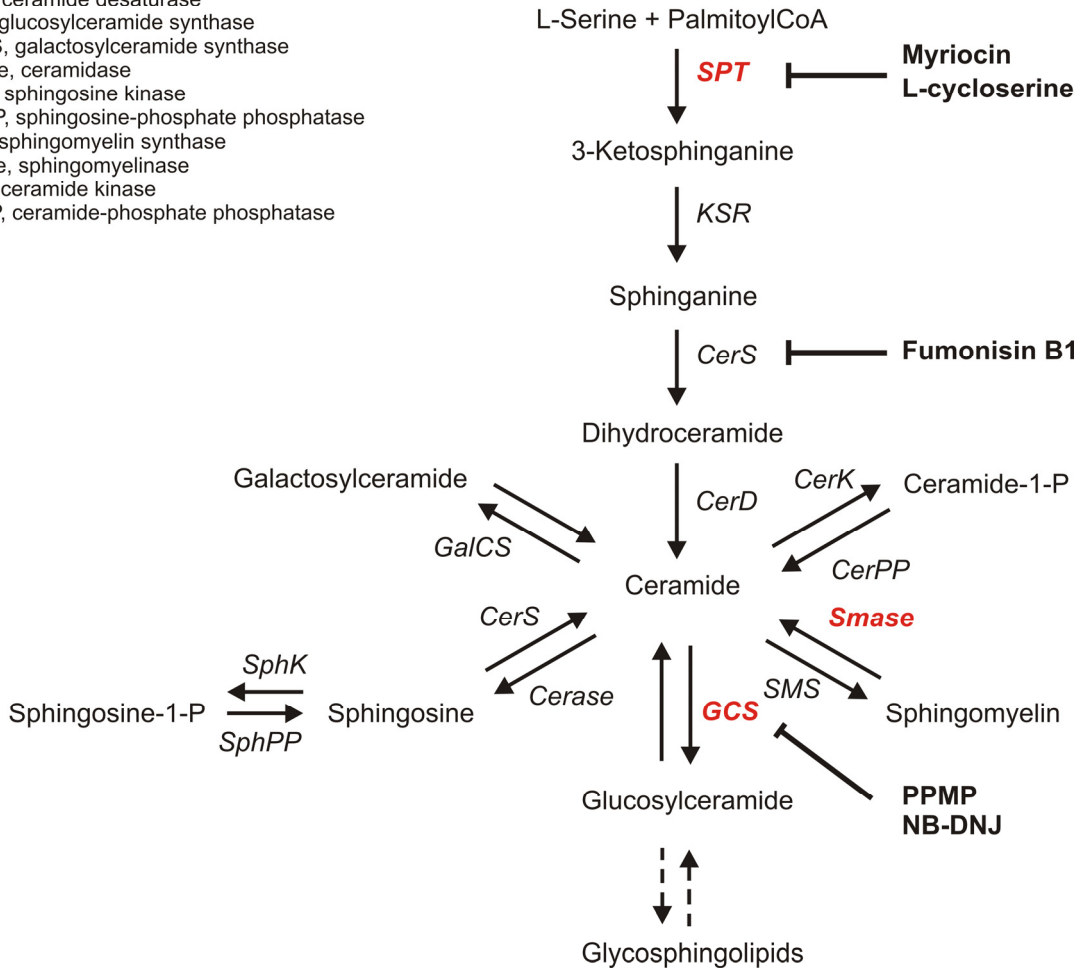

Figure S3

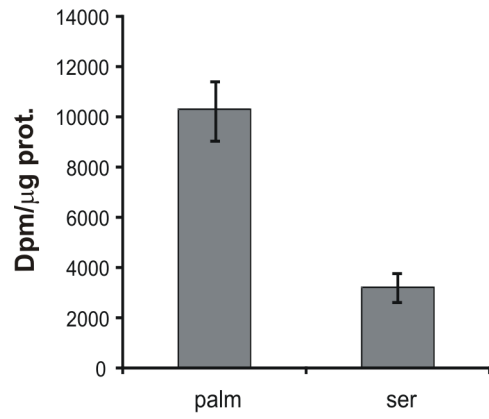

Figure S4

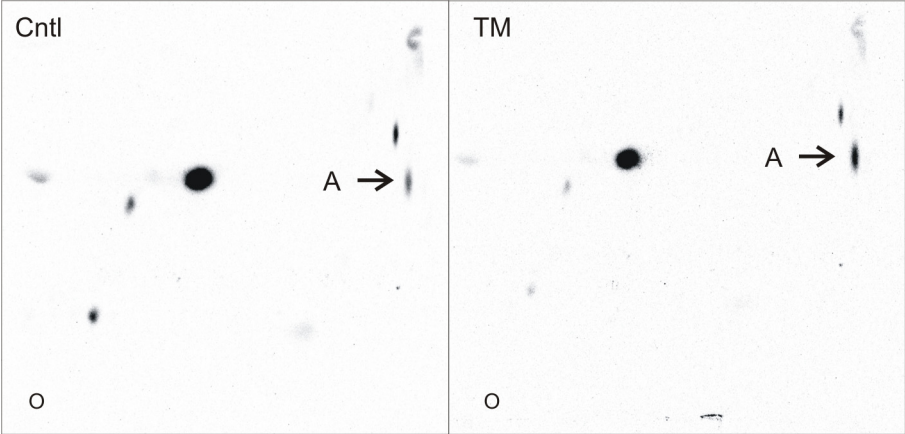

Figure S5

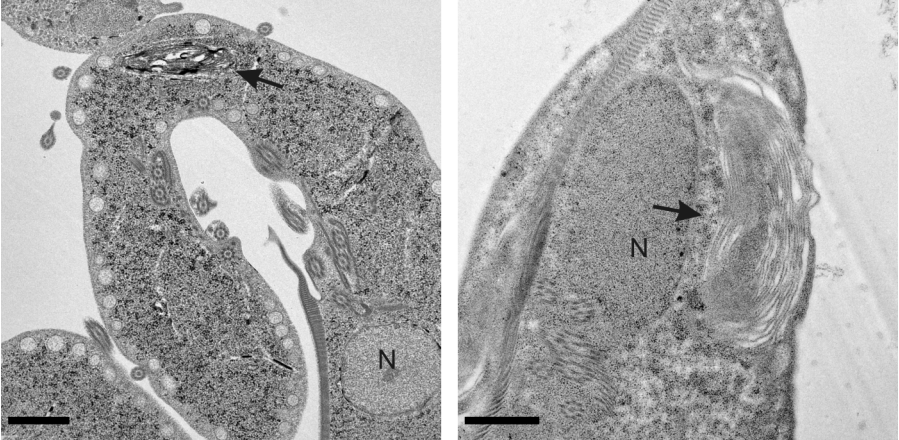

Figure S6

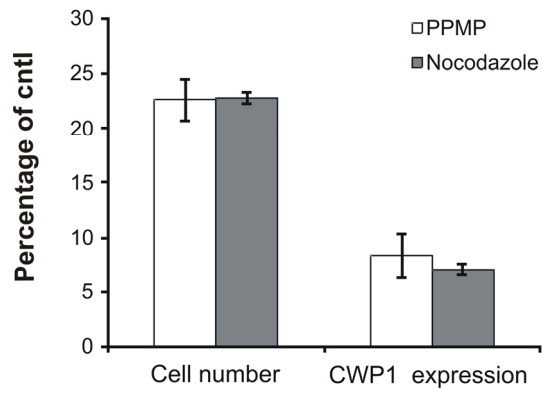



Figure S7

| <b>Organism</b>        | <b>Identity (%)</b> | <b>Similarity (%)</b> | <b>Length (aa)</b> |
|------------------------|---------------------|-----------------------|--------------------|
| <i>G. lamblia</i>      | 100                 |                       | 537                |
| <i>A. thaliana</i>     | 21.17               | 31.49                 | 519                |
| <i>G. arboreum</i>     | 20.6                | 32.68                 | 520                |
| <i>M. musculus</i>     | 12.45               | 26.76                 | 394                |
| <i>H. sapiens</i>      | 13.17               | 25.79                 | 394                |
| <i>C. elegans</i>      | 11.87               | 33.02                 | 443                |
| <i>D. melanogaster</i> | 15.32               | 25.18                 | 440                |
